# Supplementary material
Source: PubMed Central journal article supplement (PMC3277660)
Supplement: NIHMS349456-supplement-2_si_002.pdf [file NIHMS349456-supplement-2_si_002.pdf]

Table 1. Examples of lipids identified in negative ion mode from adult mouse brain tissue after aqueous washing. Lipids were identified by accurate mass using FT-ICR MS and by fragmentation patterns using a MALDI ion trap instrument. † - Lipids identified at same nominal mass. No.- lipid species, annotated by number, correlating to numbers in Supplemental Figure 2.

| No. | Classification |       | <i>m/z</i> (ppm accuracy) | Fatty acid chains                              | Assignment        |
|-----|----------------|-------|---------------------------|------------------------------------------------|-------------------|
| 1   | PI             | 18:0  | 599.3203 (-0.1)           | 18:0                                           | LPI 18:0          |
| 2   | CerP           | C18:0 | 644.5021 (0.5)            | 18:0                                           | CerP (d18:1/18:0) |
| 3   | PS             | 26:1  | 648.3891 (-1.7)           | 12:0                                           | PS (12:0/14:1)    |
| 3†  | PC             | 26:0  | 648.4619 (-3.2)           | 16:0                                           | PC (10:0/16:0)    |
| 4   | PS             | 26:0  | 650.40398(-0.2)           | 16:0                                           | PS (16:0/10:0)    |
| 5   | PA             | 34:1  | 673.4818 (0.5)            | 16:0, 18:1                                     | PA (16:0/18:1)    |
| 6   | PA             | 36:2  | 699.4963 (0.8)            | 18:1                                           | PA (18:1/18:1)    |
| 7   | PA             | 38:1  | 715.5678 (-4.3)           | 18:1 (major)<br>18:0 (minor)                   | PA (O-20:0/18:1)  |
| 8   | PE             | 36:1  | 744.5552 (-0.4)           | 18:0, 18:1 (major),<br>16:0 (minor)            | PE (18:0/18:1)    |
| 9   | PEp            | 38:6  | 746.5136 (-0.8)           | 22:6                                           | PE (P-16:0/22:6)  |
| 10  | PA             | 40:6  | 747.4970 (-0.8)           | 18:0, 22:6                                     | PA (18:0/22:6)    |
| 11  | PEp            | 38:6  | 748.5275 (1.5)            | 22:6 (major), 18:0<br>(major), 16:0<br>(minor) | PE (O-16:0/22:6)  |
| 12  | PEp            | 38:4  | 750.5448 (-0.7)           | 20:4                                           | PE(P-18:0/20:4)   |
| 13  | PS             | 34:1  | 760.5136 (-0.2)           | 16:0, 18:0                                     | PS (16:0/18:1)    |
| 14  | PS             | 34:0  | 762.5285 (0.6)            | 16:0, 18:0                                     | PS (16:0/18:0)    |
| 14† | PE             | 38:6  | 762.5076 (-0.4)           | 16:0, 22:6                                     | PE (16:0/22:6)    |
| 15  | PE             | 38:4  | 766.5395 (-0.4)           | 18:0, 20:4                                     | PE (18:0/20:4)    |
| 16  | PE             | 38:2  | 772.5860 (-0.2)           | 16:0                                           | PE (16:0/22:1)    |
| 17  | PEp            | 40:6  | 774.5445 (-0.3)           | 22:6                                           | PE (P-18:0/22:6)  |
| 18  | PI             | 30:0  | 781.4901 (3.6)            | 14:0, 16:0                                     | PI (14:0/16:0)    |
| 19  | PS             | 36:2  | 786.5290 (-0.1)           | 18:1                                           | PS (18:1/18:1)    |
| 20  | PS             | 36:1  | 788.5449 (-0.2)           | 18:0, 18:1                                     | PS (18:0/18:1)    |
| 21  | PE             | 40:6  | 790.5405 (1.0)            | 18:0, 22:6(major)                              | PE (18:0/22:6)    |
| 22  | PI             | 32:0  | 795.5372 (3.9)            | 16:0                                           | PI (O-16:0/16:0)  |
| 23  | PS             | 38:4  | 810.5296 (0)              | 18:0                                           | PS (18:0/20:4)    |
| 24  | PS             | 38:3  | 812.5452 (-0.6)           | 18:0                                           | PS (18:0/20:3)    |
| 25  | PS             | 38:1  | 816.5767 (-0.9)           | 18:0                                           | PS (18:0/20:1)    |
| 26  | PI             | 34:1  | 821.5568(-2.2)            | 18:1                                           | PI (O-16:0/18:1)  |
| 27  | PS             | 40:7  | 832.5133 (0.1)            | 18:1, 22:6                                     | PS (18:1/22:6)    |
| 28  | PS             | 40:6  | 834.5290 (0)              | 18:0, 22:6                                     | PS (18:0/22:6)    |
| 29  | PS             | 40:4  | 838.5609 (-0.7)           | 18:0, 22:4                                     | PS (18:0/22:4)    |
| 30  | PI             | 36:4  | 857.5196 (-0.2)           | 16:0, 20:4                                     | PI (16:0/20:4)    |
| 31  | PI             | 38:6  | 881.5178 (0.8)            | 16:0, 22:6                                     | PI (16:0/22:6)    |
| 32  | PI             | 38:5  | 883.5344 (-0.2)           | 18:1, 20:4                                     | PI (18:1/20:4)    |
| 33  | PI             | 38:4  | 885.5500 (-0.2)           | 18:0, 20:4                                     | PI (18:0/20:4)    |
| 34  | PI             | 40:6  | 909.5503 (-0.6)           | 18:0, 22:6                                     | PI (18:0/22:6)    |
| 35  | PIP            | 38:4  | 965.5158 (-0.4)           | 18:0, 20:4                                     | PIP (18:0/20:4)   |
| 36  | PIP2           | 38:4  | 1045.4819 (0.6)           | 18:0, 20:4                                     | PIP2 (18:0/20:4)  |
| 37  | GM1            |       | 1542.8673 (1.0)           | d18:1/18:1                                     |                   |
| 38  | GM1a           |       | 1544.8881 (0.7)           | d18:1/18:0                                     |                   |

|     | <b>Sulfatides</b> | <b>m/z<br/>(ppm<br/>accuracy)</b> | <b>Ceramide</b> |
|-----|-------------------|-----------------------------------|-----------------|
| S1  | C16               | 778.5145 (-0.1)                   | d18:1/16:0      |
| S2  | C18:1             | 804.5296 (0.6)                    | d18:1/18:1      |
| S3  | C18               | 806.5456 (0.1)                    | d18:1/18:0      |
| S4  | C18-OH            | 822.5406 (0)                      | d18:0/2-OH-18:0 |
| S5  | C20-OH            | 850.5721 (-0.1)                   | d18:0/2-OH-20:0 |
| S6  | C22:1             | 860.5932 (-0.6)                   | d18:1/22:1      |
| S7  | C22               | 862.6097 (-1.2)                   | d18:1/22:0      |
| S8  | C23:1             | 874.6092 (-0.9)                   | d18:1/23:1      |
| S9  | C23               | 876.6234 (0.7)                    | d18:1/C23       |
| S10 | C22               | 878.6032 (-0.3)                   | d18:0/2-OH-22:0 |
| S11 | C24:1             | 888.6233 (0.7)                    | d18:1/24:1      |
| S12 | C24               | 890.6396 (0.6)                    | d18:1/24:0      |
| S13 | C25:1             | 902.6417 (-2.3)                   | d18:1/25:1      |
| S14 | C24:1-OH          | 904.6190 (0.08)                   | d18:0/2-OH-24:1 |
| S15 | C24-OH            | 906.6345 (0.1)                    | d18:1/2-OH-24:0 |
| S16 | C26:1             | 916.6554 (-0.1)                   | d18:1/N26:1     |
